# Supplementary material for: The simple-preparation of Cu–Ni/CuO–NiO using solution plasma for application in a glucose enzyme-free sensor
Source: Royal Society of Chemistry journal article supplement (doi:10.1039/d0nj01464h), 2020-01-01
Supplement: d0nj01464h1.pdf [file d0nj01464h1.pdf]

## Supplementary Materials

### **Simple-preparation of Cu-Ni/CuO-NiO by solution plasma for the application in glucose enzyme-free sensor**

Bingqian Yang<sup>1,2,3</sup>, Jingyuan Qiao<sup>1,2,3</sup>, Yawei Yu<sup>1,2,3</sup>, Lefan Yuan<sup>1,2,3</sup>, Xiulan Hu<sup>1,2,3,\*</sup>

<sup>1</sup>College of Materials Science and Engineering, Nanjing Tech University, Puzhu

South Road No.30, 211816, Nanjing, Jiangsu, China

<sup>2</sup>The Synergetic Innovation Center for Advanced Materials, Puzhu South Road No.30,

211816, Nanjing, Jiangsu, China

<sup>3</sup>Jiangsu Collaborative Innovation Center for Advanced Inorganic Function

Composites, Nanjing Tech University, Puzhu South Road No.30, 211816, Nanjing,

Jiangsu, China

\*Correspondence information: Xiulan Hu, College of Materials Science and

Engineering, Nanjing Tech University, Puzhu South Road No.30, 211816, Nanjing,

Jiangsu, China.

E-mail: [whoxiulan@163.com](mailto:whoxiulan@163.com)

The detailed description for XRD results of NO, CNO and CO catalysts with  $2\theta$  angles and diffraction planes in Fig. 1 are as the following:

We can see that CO (red curve) has more obvious diffraction peaks at  $32.54^\circ$ ,  $35.46^\circ$ ,  $35.56^\circ$ ,  $38.76^\circ$ ,  $38.92^\circ$ ,  $46.27^\circ$ ,  $48.70^\circ$ ,  $51.41^\circ$ ,  $53.55^\circ$ ,  $58.33^\circ$ ,  $61.56^\circ$ ,  $66.22^\circ$  and  $68.15^\circ$ . These are corresponding to (110), (002), (-111), (111), (200), (-112), (-202), (112), (020), (202), (-113), (-311) and (220) crystal plane of CuO (JCPDS No. 89-5899), respectively. In addition, there are two diffraction peaks of Cu (111) and (200) crystal plane (JCPDS NO. 70-3039) at  $43.34^\circ$  and  $50.48^\circ$ , which shows that we successfully prepared copper and copper oxide (CO) by solution plasma method and heat treatment. For NO (black curve), there are obvious diffraction peaks at  $37.24^\circ$ ,  $43.29^\circ$  and  $62.90^\circ$ , which correspond to (110), (-111) and (111) crystal plane of NiO (JCPDS No. 89-7131), respectively. At the same time, the diffraction peaks of the (111), (200), (220) crystal planes of Ni (JCPDS No. 70-1849) appeared at  $44.48^\circ$ ,  $51.83^\circ$  and  $76.35^\circ$ , indicating that we successfully prepared nickel and nickel oxide (NO) by solution plasma method and heat treatment. Finally observed CNO (blue curve) and it can be seen from the figure that after the introduction of Cu and CuO on the basis of Ni and NiO, the positions of the diffraction peaks of NO and CNO are not much different. For carefully comparing the NO (red) and CNO (black) patterns, it can be seen the diffraction peaks at about  $37^\circ$  and  $43^\circ$  are broadened to a certain extent, the same diffraction peak of  $2\theta$  around  $43^\circ$  has also changed to a certain extent. It is worth noting the strongest diffraction peak at about  $43^\circ$  of CNO is similar with that of NO probably because the lattice constant of Cu and NiO are too close to distinguish them clearly by XRD detection. The most obvious case is that the diffraction peak at about  $62^\circ$ . Compared with the peak shape of NO, the obvious broaden diffraction peak of CNO at  $62^\circ$  may relative to NiO and CuO, respectively.

Table S1 Comparison of the reproducibility and stability of other previously related materials nonenzymatic glucose sensor with this work.

| Electrodes                | RSD<br>(the same electrode) | RSD<br>(different electrodes) | Long-term stability | Reference |
|---------------------------|-----------------------------|-------------------------------|---------------------|-----------|
| Cu/Ni/C                   | 2.07%                       | 3.01%                         | 60 days - 90%       | [1]       |
| CuNi/fMWCNTs              | 2.6%                        | 3.2%                          | 30 days - 90%       | [2]       |
| Ni/Cu/CNTs                | 3.6%                        | 4.9%                          | 25 days - 90%       | [3]       |
| Cu-xCu <sub>2</sub> O NPs | 1.02%                       | —                             | 6000 s - 92.2%      | [4]       |
| Cu-MOF                    | —                           | 5%                            | 7 days - 85%        | [5]       |
| NiO-NC@rGO                | 2.2%                        | 3.1%                          | 10 days - 95%       | [6]       |
| Ni(II)-CP/C60             | 4.37%                       | 1.16%                         | 30 days - 93%       | [7]       |
| CNO/GNs                   | 1.72%                       | 3.28%                         | 42 d - 90.68%       | This work |

References:

- [1] L. Zhang, C. Ye, X. Li, Y. Ding, H. Liang, G. Zhao and Y. Wang, *Nanomicro Lett*, 2018, 10, 28.
- [2] W. Yi, J. Liu, H. Chen, Y. Gao and H. Li, *Journal of Solid State Electrochemistry*, 2015, 19, 1511-1521.
- [3] S. Ammara, S. Shamaila, N. zafar, A. Bokhari and A. Sabah, *Journal of Physics and Chemistry of Solids*, 2018, 120, 12-19.
- [4] Z. Khosroshahi, F. Karimzadeh, M. Kharaziha and A. Allafchian, *Materials science & engineering. C, Materials for biological applications*, 2020, 108, 110216.
- [5] Y. Sun, Y. Li, N. Wang, Q. Q. Xu, L. Xu and M. Lin, *Electroanalysis*, 2018, 30, 474-478.
- [6] Y. Zhang, Y.-Q. Liu, Y. Bai, W. Chu and J. Sh, *Sensors and Actuators B: Chemical*, 2020, 309, 127779.
- [7] L. Shahhoseini, R. Mohammadi, B. Ghanbari and S. Shahrokhian, *Applied Surface Science*, 2019, 478, 361-372.

Table S2. Detection of glucose in human blood samples.

| Commercial glucose<br>meter <sup>a</sup> (mM) | This method<br>(mM) | Recovery<br>(%) |
|-----------------------------------------------|---------------------|-----------------|
|                                               | 5.62                | 104.1           |
| 5.4                                           | 5.26                | 97.4            |
|                                               | 5.80                | 107.4           |

<sup>a</sup> Commercial glucose meter: Yuwell 580 glucose meter, Jiangsu Yuyue medical equipment & supply Co., Ltd, China.

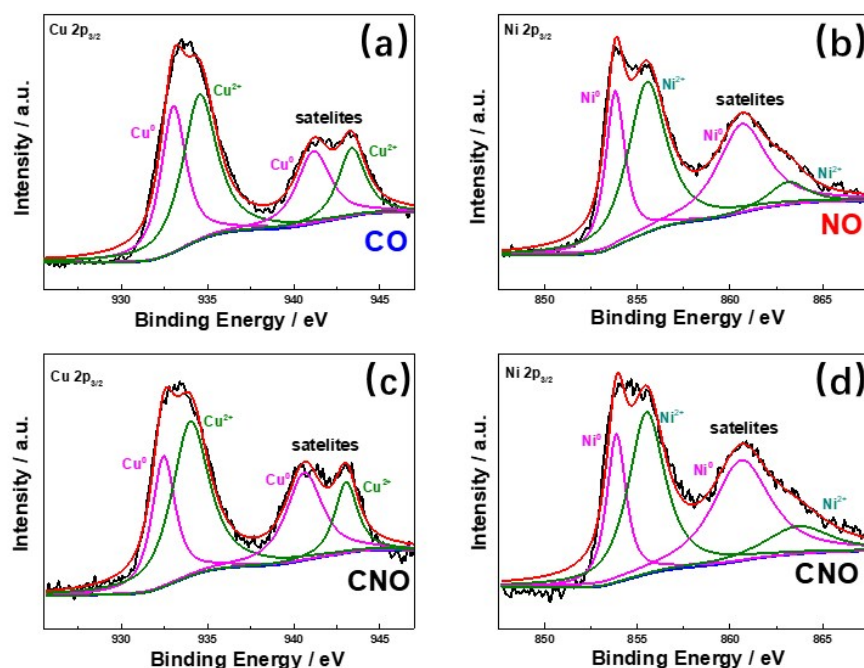

**Fig. S1.** XPS spectra of (a) Cu  $2p_{3/2}$  for CO, (b) Ni  $2p_{3/2}$  for NO, (c) Cu  $2p_{3/2}$  for CNO and (d) Ni  $2p_{3/2}$  for CNO.

In order to explore further evidences for the elemental composition of the as-prepared CNO, the XPS measurements were conducted for three samples (Fig. S1). As depicted in Fig. S1a and Fig. S1c, in the Cu  $2p_{3/2}$  region, we can easily see that the values for CNO manifest an obvious negative shift comparing with the binding energy of Cu<sup>0</sup> and Cu<sup>2+</sup> for CO. Meanwhile the binding energy of Ni<sup>0</sup> and Ni<sup>2+</sup> for CNO (Fig. S2d) also smaller than that for NO (Fig. S1b). These negative shifts are owing to the electronic interaction which could make the Cu and Ni element easier to convert between zero-valence, divalence and trivalence during the catalytic process for better catalytic performance. Combined with the XRD and XPS results, Cu, CuO, Ni and NiO are indeed co-exist in CNO sample.
